# Supplementary material
Source: PubMed Central journal article supplement (PMC3069486)
Supplement: NIHMS278998-supplement-01.pdf [file NIHMS278998-supplement-01.pdf]

## Supplementary data

### **Supplementary figure 1. Alignment of the cDNA derived and for *E. coli* expression optimised hKDEL genes.**

Alignment of the cDNA derived gene encoding hKDEL (KDELR1 ERD 2.1) and for expression in *E. coli* optimised version as designed by Geneart ([www.geneart.com](http://www.geneart.com)). The figure was created using the program multalin (Corpet, F. (1988). Multiple sequence alignment with hierarchical clustering. *Nucleic Acids Res* **16**, 10881-90). The stop codon is missing since in this study the gene encoding hKDEL is fused through a linker to *gfp* (see “Material and Methods”).

|                                   |                                                                                                                                                                                                                                                                                                                                                                                                              |     |     |     |     |     |     |     |     |     |     |     |     |     |     |
|-----------------------------------|--------------------------------------------------------------------------------------------------------------------------------------------------------------------------------------------------------------------------------------------------------------------------------------------------------------------------------------------------------------------------------------------------------------|-----|-----|-----|-----|-----|-----|-----|-----|-----|-----|-----|-----|-----|-----|
|                                   | 1                                                                                                                                                                                                                                                                                                                                                                                                            | 10  | 20  | 30  | 40  | 50  | 60  | 70  | 80  | 90  | 100 | 110 | 120 | 130 |     |
| hKDELwt<br>optimized<br>Consensus | ATGAAATCTCTCCGATTCG666AGCCCTCCCCACCCTCCCTGACACTTGCACATCATCTTCCGCTCCTCCGCTCG666GAAAGCCAGGTTCTGTTTGGCTG666TGT<br>ATGAACTGTCTTCC6aTTCTG666aGACCTCAACCCACCTCTCTGCAATCAATCCGCTGAAATTTGGAAAGCCGAGCAGCTG666GAAAGCCAGGTTCTGTTTGGCTG666TGT<br>ATGAACTCTCTTCC6aTTCTG666aGACCTCAACCCACCTCTCTGCAATCAATCCGCTGAAATTTGGAAAGCCGAGCAGCTG666GAAAGCCAGGTTCTGTTTGGCTG666TGT                                                      | 131 | 140 | 150 | 160 | 170 | 180 | 190 | 200 | 210 | 220 | 230 | 240 | 250 | 260 |
| hKDELwt<br>optimized<br>Consensus | TCACCTGCCCGAATATCTGGACCTCTCACCAACATACATCTCACTTACACACAGCTGTATGAAAGTGGTTCATACAGCTTCCCTCACACACAGCTTGGTTGATTTATAGCAAGTTCAAGGCTACTTACGA<br>TTACCGACGTTATCTGGACCTCTCACCAACATACATCTCACTTACACACAGCTGTATGAAAGTGGTTCATACAGCTTCCCTCACACACAGCTTGGTTGATTTATAGCAAGTTCAAGGCTACTTACGA<br>TcACcGc-aCGaTATCTGGACCTCTCACCAACATACATCAcAcACTTAcAcAGAcCTGcATGAAAGTGGTTCATACAGCTTCCCTCACACACAGCTTGGTTGATTTATAGCAAGTTCAAGGCTACTTAcGA | 261 | 270 | 280 | 290 | 300 | 310 | 320 | 330 | 340 | 350 | 360 | 370 | 380 | 390 |
| hKDELwt<br>optimized<br>Consensus | TGGAAACCATGACACGTTCAAGAGTGGAGTTCTCTGGTGTCCACAGCCATTCAGCCCTTGGAGTATTCACCCCTTGGAGTCTCTCAGCTTACCTGGAGTCAAGTGTGGC<br>TGGCAATCATGATACCTTTCAGCTTGGATTTCTGGTGTCCACAGCCATTCAGCCCTTGGAGTATTCACCCCTTGGAGTCTCTCAGCTTACCTGGAGTCAAGTGTGGC<br>TGGcAAcCATGAcAcCTTcAaGAGTgGAATTCCTGGTGTCCAcAGcATTCAGCCCTTGGAGTATTCACCCCTTGGAGTCTCTCAGCTTAcAcCATcTAcCTGGAAAcAcGTgGcA                                                          | 391 | 400 | 410 | 420 | 430 | 440 | 450 | 460 | 470 | 480 | 490 | 500 | 510 | 520 |
| hKDELwt<br>optimized<br>Consensus | ATCTTGGCCGACCTGTTTCATG66TGGCAAGACCGCCG66CGAGCCATCACACCCATACCTTGTGGCTTGGCCTTACCGCTTATCTCTCAACTGGATCTGGCCCTACCATTTGGAGG<br>ATTCGGCCGACCTGTTTCATG66TGGCAAGACCGCCG66CGAGCCATCACACCCATACCTTGTGGCTTGGCCTTACCGCTTATCTCTCAACTGGATCTGGCCCTACCATTTGGAGG<br>ATcCTGGCCGAcCTGTTcATG66TgGCAAGAcCGCCGcAGCCcATcAcAcCCATAcAcCTTGTGGCTTGGCCTTAcCGCTTATcCTcAACTGGATcTGGCCCTAcCATTTGGAAG                                         | 521 | 530 | 540 | 550 | 560 | 570 | 580 | 590 | 600 | 610 | 620 | 630 | 636 |     |
| hKDELwt<br>optimized<br>Consensus | GCTTCTCGACCTCATCGCATTTG666GCTGGGTCAGACAGTCTCTACCTGCGATTTCTTACTCTATATCACCAAGTCTTAAAGGCGAGAGGTTGAGTTTGGCCGCA<br>GCTTCTCGACCTCATCGCATTTG666GCTGGGTCAGACAGTCTCTACCTGCGATTTCTTACTCTATATCACCAAGTCTTAAAGGCGAGAGGTTGAGTTTGGCCGCA<br>GCTTcTcGAcCTcATcGcCATTGTgGcAGGcCTGGGTCAGAcAGTCTCTAcCTGCGATTTCTTAcCTcTATATcAcCAAGTcCTAAAGGcGAGAGGTTGAGTTTGGCCGCA                                                                  |     |     |     |     |     |     |     |     |     |     |     |     |     |     |

-Supplementary Figure 1-

**Supplementary figure 2. 2D BN/ SDS gel of cytoplasmic membranes of C43(DE3) cells not overexpressing hKDEL-GFP.**

Cytoplasmic membrane fractions of cells expressing hKDEL-GFP and non-expressing control cells were isolated and analysed using 2D BN/ SDS-PAGE combined with colloidal Coomassie staining as described in “Material and Methods”. A representative gel of C43(DE3) control membranes is shown here. The numbers in the gel refer to the numbers in supplementary table 1.

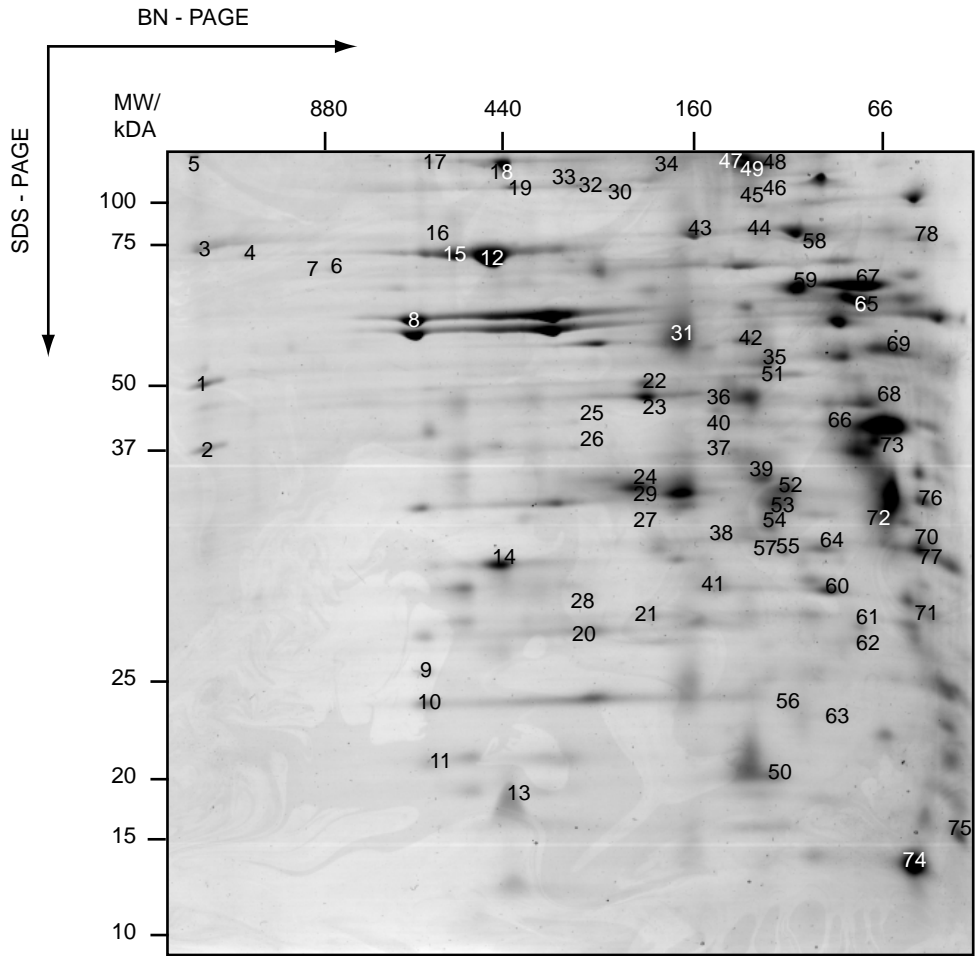

-Supplementary Figure 2-

**Supplementary figure 3. 2D SDS gels of whole cell lysates of BL21(DE3)pLysS, C41(DE3) and C43(DE3) cells overexpressing hKDEL-GFP and controls by 2D gel electrophoresis.**

Whole cell samples of cells expressing hKDEL-GFP and control cells were cultured and prepared for 2D SDS-PAGE as described in “Material and Methods”. Each condition was run in quadruplet; each of the four representing a biologically independent sample. The gels were stained by colloidal Coomassie. Quantification data and results of the ANOVA analysis are presented in supplementary table 2. The numbers in the gel in the upper corner on the left refer to the numbers in supplementary table 2.

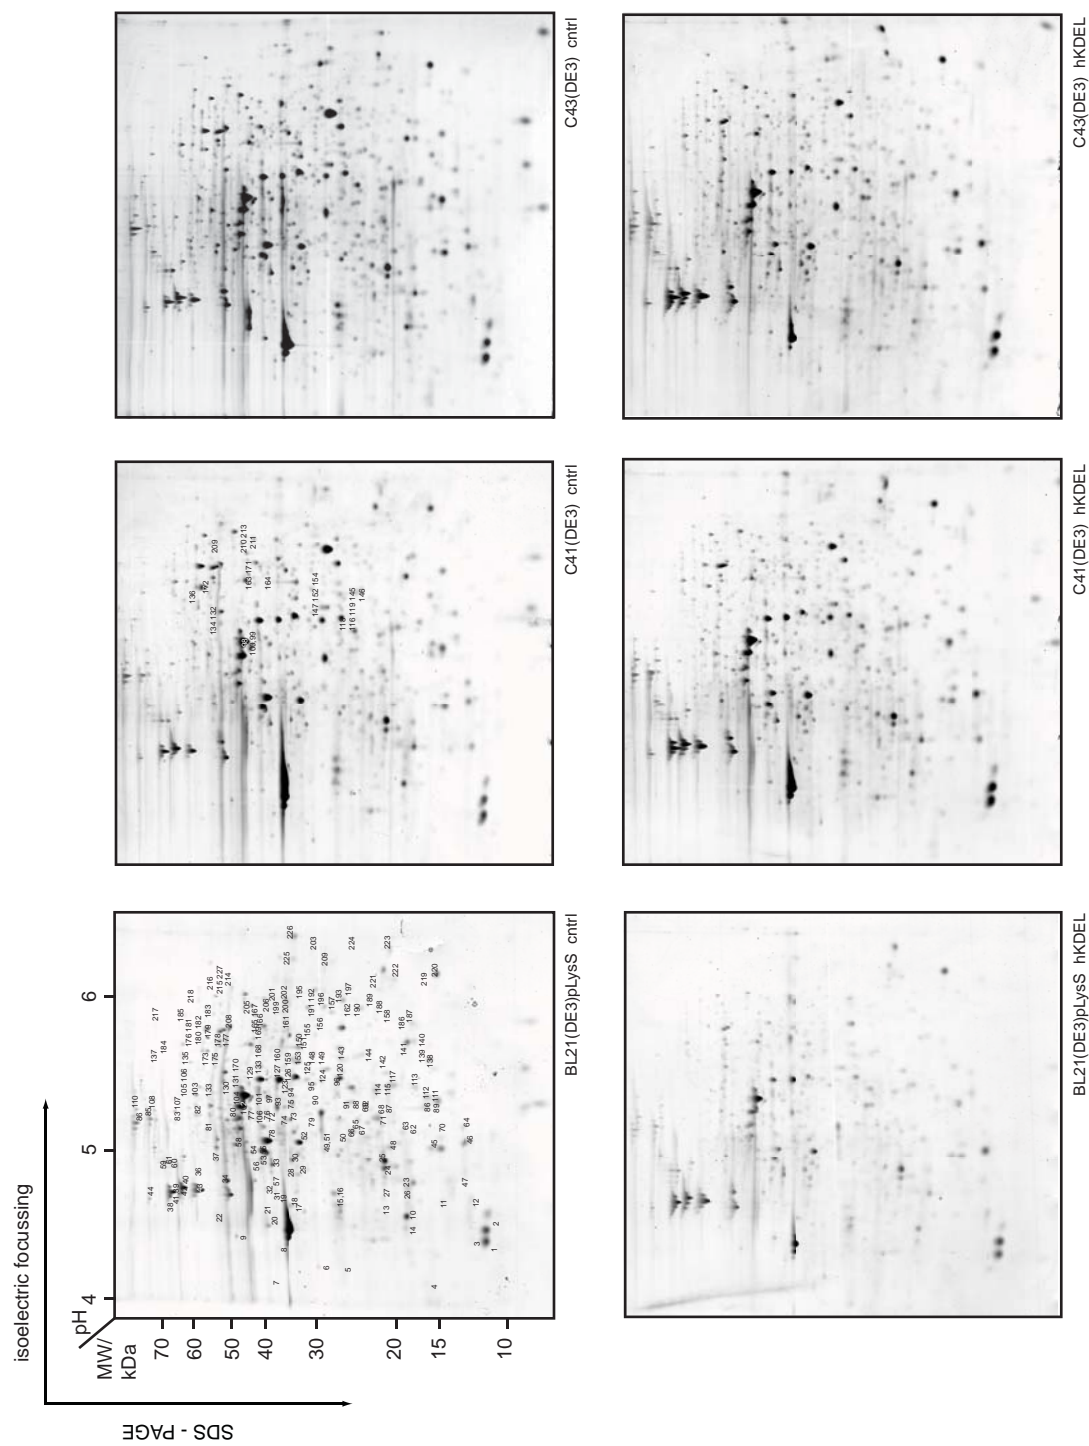

-Supplementary Figure 3-

**Supplementary figure 4. Immuno-blot analysis of BL21(DE3)pLysS, C41(DE3) and C43(DE3) cells expressing hKDEL-GFP and control cells with a GFP antibody.**

After 4 h of induction proteins of whole cell lysates of BL21(DE3)pLysS, C41(DE3) and C43(DE3) cells with the empty control vector and overexpressing hKDEL-GFP were separated by means of SDS-PAGE and subsequently subjected to immuno-blotting analysis with an antibody against GFP (see “Material and Methods”). The hKDEL-GFP bands represent the fluorescent bands shown in figure 1C.

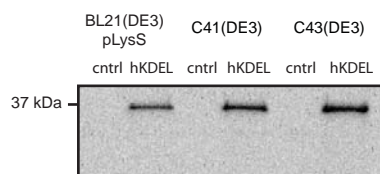

-Supplementary Figure 4-



**Supplementary Table 1: Relative quantification and mass spectrometry identification of spots from 2D BN/ SDS gels of cytoplasmic membranes of cells overexpressing hKDEL-GFP and control cells.**

2D BN/ SDS gels of cytoplasmic membranes were analysed as described by Klepsch et al. (Klepsch, M., Schlegel, S., Wickstrom, D., Friso, G., van Wijk, K. J., Persson, J. O., de Gier, J. W. & Wagner, S. (2008). Immobilization of the first dimension in 2D blue native/ SDS-PAGE allows the relative quantification of membrane proteomes. *Methods* 46, 48-53). For each spot a two-way ANOVA with treatment (i.e., hKDEL-GFP overexpression) and strain as factors was performed on log transformed data, resulting in a p-value for each spot. Spots with missing data in all replicates, for some combination of treatment and strain, were excluded from the ANOVA-analysis. The effect of those 43 spots was "qualitative". Significant effects for "treatment", "strain", "treatment and strain" (no interaction), and "interaction" were found for 35 spots. Non-identifiable proteins were excluded from the data set. In the end, 80 proteins in 78 spots remained. A grouping of the spots on the kind of effect was done. The effects were "treatment", "strain", "Treatment and strain (no interaction)" and "interaction". Furthermore, matrix and/ or auto-proteolytic trypsin fragments were removed by the software Peak Eraser v2.01 (Lighthouse data). Gray coloring groups proteins belonging to the same complex.

Abbreviations: acc., accession; quant., quantitation.

| spot Nr.<br>(a) | gene name<br>(b) | UniProt<br>acc. | predicted<br>MW (kDa)<br>(precursor/<br>mature)<br>(c) | observed<br>MW<br>(kDa) (d) | observed<br>mass in<br>complex<br>(d) | ANOVA            |                      |                   |                        |                | standard<br>deviation | BL21(DE3)pLysS                      |                     |                                     |                        | C41(DE3)                            |                     |                                     |                        | C43(DE3)                            |                     |                                  |                        |
|-----------------|------------------|-----------------|--------------------------------------------------------|-----------------------------|---------------------------------------|------------------|----------------------|-------------------|------------------------|----------------|-----------------------|-------------------------------------|---------------------|-------------------------------------|------------------------|-------------------------------------|---------------------|-------------------------------------|------------------------|-------------------------------------|---------------------|----------------------------------|------------------------|
|                 |                  |                 |                                                        |                             |                                       | p-value<br>model | p-value<br>treatment | p-value<br>strain | p-value<br>interaction | effect         |                       | quant.<br>value<br>(control)<br>(e) | CV<br>(control) (f) | quant.<br>value<br>(KDEL-OE)<br>(e) | CV<br>(KDEL-OE)<br>(f) | quant.<br>value<br>(control)<br>(e) | CV<br>(control) (f) | quant.<br>value<br>(KDEL-OE)<br>(e) | CV<br>(KDEL-OE)<br>(f) | quant.<br>value<br>(control)<br>(e) | CV<br>(control) (f) | quant. value<br>(KDEL-OE)<br>(e) | CV<br>(KDEL-OE)<br>(f) |
| 1               | hfkK             | P0ABC7          | 45.5                                                   | 40.87                       | 1142                                  | 0.003538         | 0.00657              | 0.002028          | 0.749241               | beh and strain | 0.740499              | 303.4                               | 61.40%              | 650.8                               | 16.10%                 | 1478.4                              | 46.60%              | 6284.1                              | 27.30%                 | 1631.1                              | 110.00%             | 3593.9                           | 63.80%                 |
| 2               | hfkC             | P0ABC3          | 37.7                                                   | 37.7                        | 1130                                  | 0.012375         | 0.287844             | 0.098255          | 0.005041               | interaction    | 0.657169              | 2054.9                              | 29.50%              | 493.2                               | 17.70%                 | 1271.6                              | 80.80%              | 5024.6                              | 27.00%                 | 912.3                               | 90.90%              | 1972                             | 61.30%                 |
| 3               | hfkB             | P0AAJ3          | 70.7                                                   | 72.12                       | 1100                                  | 0.000395         | 9.32E-01             | 0.002459          | 0.000324               | interaction    | 0.456854              | 5602.4                              | 35.50%              | 1270.7                              | 62.70%                 | 1834.2                              | 11.20%              | 7778.7                              | 27.90%                 | 1130.3                              | 48.20%              | 1287.6                           | 36.20%                 |
| 4               | nuoCD            | P33599          | 68.7                                                   | 68.39                       | 1036                                  | 0.022801         | 0.547257             | 0.006196          | 0.205216               | strain only    | 0.553653              | 655.4                               | 44.40%              | 321.8                               | 62.80%                 | 706.4                               | 28.20%              | 891.1                               | 82.90%                 | 183.2                               | 47.10%              | 231.3                            | 8.50%                  |
| 5               | nsrR             | P0AF63          | 15.6                                                   | 124                         | 1200                                  | 0.000145         | 0.942593             | 1.93E-05          | 0.250627               | strain only    | 0.455391              | 1100                                | 41.20%              | 599.2                               | 20.50%                 | 3000.7                              | 32.60%              | 3783                                | 28.20%                 | 367.5                               | 67.50%              | 412.1                            | 36.40%                 |
| 6               | nuoCD            | P33599          | 68.7                                                   | 63.45                       | 829                                   |                  |                      |                   |                        | qualitative    |                       | 299.3                               | 49.00%              | 0.00%                               | 1032.7                 | 46.00%                              | 2278.3              | 55.00%                              | 89                     | 62.30%                              | 226.4               | 59.70%                           |                        |
| 7               | nuoCD            | P33599          | 68.7                                                   | 63.12                       | 877                                   |                  |                      |                   |                        | qualitative    |                       | 98.1                                | 17.80%              | 0.00%                               | 121.6                  | 63.10%                              | 2701.4              | 162.50%                             | 8.6                    | 131.00%                             | 45.8                | 60.90%                           |                        |
| 8               | atpA             | P0ABB0          | 55.2                                                   | 48.32                       | 634                                   | 0.006748         | 0.067                | 0.001875          | 0.417535               | strain only    | 0.290311              | 17556.4                             | 46.40%              | 17153.9                             | 9.00%                  | 9608.4                              | 11.50%              | 15831.7                             | 13.80%                 | 24522.9                             | 39.80%              | 32241.2                          | 30.80%                 |
| 9               | atpH             | P0ABA4          | 19.3                                                   | 22.02                       | 612                                   | 2.47E-06         | 0.129317             | 2.18E-07          | 0.508966               | strain only    | 0.502353              | 207                                 | 27.50%              | 243.7                               | 70.20%                 | 4053.1                              | 38.90%              | 7829.5                              | 49.80%                 | 327                                 | 55.60%              | 495.7                            | 14.60%                 |
| 10              | atpF             | P0ABA0          | 17.3                                                   | 19.95                       | 604                                   | 1.68E-06         | 0.047375             | 1.65E-07          | 0.308945               | beh and strain | 0.438448              | 622.5                               | 6.80%               | 663                                 | 46.10%                 | 8895.3                              | 54.10%              | 16193.4                             | 1.00%                  | 782.8                               | 45.40%              | 1467.8                           | 43.70%                 |
| 11              | atpC             | P0A6E6          | 15.1                                                   | 16.5                        | 592                                   |                  |                      |                   |                        | qualitative    |                       | 0.00%                               | 7756.3              | 29.20%                              | 4298.9                 | 17.40%                              | 11260.8             | 20.60%                              | 7213.5                 | 85.60%                              | 313                 | 64.30%                           |                        |
| 12              | sdhA             | P0AC41          | 64.4                                                   | 68.39                       | 447                                   | 6.39E-04         | 3.13E-01             | 0.000741          | 0.002731               | interaction    | 0.256781              | 65448                               | 55.10%              | 137739.8                            | 18.60%                 | 71216.9                             | 7.40%               | 44231.2                             | 24.90%                 | 117559                              | 6.50%               | 124406.6                         | 14.20%                 |
| 13              | sdhC             | P69054          | 14.3                                                   | 14.77                       | 411                                   | 3.65E-03         | 2.86E-01             | 0.000891          | 0.128126               | strain only    | 1.385731              | 50556.4                             | 86.30%              | 952.6                               | 91.50%                 | 63536.4                             | 22.90%              | 84704.8                             | 35.80%                 | 1266.4                              | 81.00%              | 1798                             | 27.90%                 |
| 14              | sdhB             | P07014          | 26.8                                                   | 31.3                        | 430                                   | 0.001806         | 0.774697             | 0.000523          | 0.040427               | interaction    | 0.374502              | 5019.8                              | 78.70%              | 8523.6                              | 20.50%                 | 24940.4                             | 9.20%               | 15068                               | 35.90%                 | 8753.8                              | 31.00%              | 8540.6                           | 14.50%                 |
| 14              | manZ             | P69805          | 31.3                                                   | 31.3                        | 430                                   | 0.001806         | 0.774697             | 0.000523          | 0.040427               | interaction    | 0.374502              | 5019.8                              | 78.70%              | 8523.6                              | 20.50%                 | 24940.4                             | 9.20%               | 15068                               | 35.90%                 | 8753.8                              | 31.00%              | 8540.6                           | 14.50%                 |
| 15              | nuoCD            | P33599          | 68.7                                                   | 68.87                       | 539                                   | 0.000705         | 0.075022             | 0.000132          | 0.254171               | strain only    | 0.319349              | 31093.4                             | 33.10%              | 18192.4                             | 16.50%                 | 10613.7                             | 14.00%              | 7335.4                              | 45.00%                 | 23375.4                             | 30.00%              | 24917.8                          | 20.90%                 |
| 16              | fdoH             | P0AAJ5          | 33.1                                                   | 78.5                        | 574                                   |                  |                      |                   |                        | qualitative    |                       | 0.00%                               | 356.8               | 36.60%                              | 390.2                  | 15.30%                              | 0.00%               | 0.00%                               | 0.00%                  | 0.00%                               | 0.00%               | 0.00%                            | 0.00%                  |
| 17              | fdoG             | P32176          | 112.5                                                  | 116.93                      | 596                                   |                  |                      |                   |                        | qualitative    |                       | 384.5                               | 26.20%              | 102                                 | 32.10%                 | 0.00%                               | 0.00%               | 0.00%                               | 155.4                  | 52.60%                              | 306.5               | 54.50%                           |                        |
| 18              | acrB             | P31224          | 113.574                                                | 113.55                      | 423                                   | 0.001206         | 0.70138              | 0.000668          | 0.009937               | interaction    | 0.388026              | 30437.5                             | 35.80%              | 10755.2                             | 16.50%                 | 4004.3                              | 17.80%              | 7660.1                              | 38.60%                 | 10863.2                             | 33.00%              | 13943.3                          | 50.70%                 |
| 19              | yrbD             | P64604          | 19.6/16.5                                              | 105.07                      | 408                                   |                  |                      |                   |                        | qualitative    |                       | 0.00%                               | 0.00%               | 0.00%                               | 899.6                  | 3.80%                               | 1425.4              | 59.20%                              | 0.00%                  | 0.00%                               | 0.00%               | 0.00%                            |                        |
| 20              | atpB             | P0AB98          | 30.3                                                   | 25.06                       | 280                                   |                  |                      |                   |                        | qualitative    |                       | 618.8                               | 54.00%              | 470.7                               | 45.30%                 | 0.00%                               | 420.2               | 22.70%                              | 453.8                  | 23.40%                              | 556.5               | 22.80%                           |                        |
| 21              | malG             | P68183          | 32.2                                                   | 26.37                       | 230                                   | 0.017697         | 0.076149             | 0.025559          | 0.051178               | strain only    | 0.66711               | 792.5                               | 46.20%              | 798                                 | 19.70%                 | 598.8                               | 44.50%              | 127.5                               | 79.70%                 | 479.2                               | 57.70%              | 407.9                            | 43.70%                 |
| 22              | malF             | P02916          | 57                                                     | 40.97                       | 237                                   | 0.003052         | 0.114783             | 0.003229          | 0.014893               | interaction    | 0.353692              | 2273.1                              | 35.30%              | 2927.1                              | 18.20%                 | 1956.7                              | 28.90%              | 726.7                               | 50.10%                 | 1262.9                              | 22.50%              | 1175.5                           | 15.20%                 |
| 23              | malK             | P68187          | 41                                                     | 40.19                       | 238                                   | 0.000969         | 0.046543             | 0.006158          | 0.001413               | interaction    | 0.268324              | 7394.1                              | 8.60%               | 10676.7                             | 8.00%                  | 8474.4                              | 12.20%              | 3060                                | 49.50%                 | 6284.8                              | 26.20%              | 5552.9                           | 3.90%                  |
| 24              | arnC             | P77757          | 36.3                                                   | 35.39                       | 244                                   | 8.09E-04         | 8.45E-01             | 9.84E-05          | 0.293888               | strain only    | 0.838344              | 717.4                               | 35.10%              | 341.9                               | 28.10%                 | 8409                                | 41.30%              | 33981.3                             | 87.60%                 | 3011.9                              | 79.50%              | 1780.5                           | 20.50%                 |
| 25              | yfgL             | P77774          | 41.9                                                   | 39.01                       | 301                                   | 0.003505         | 9.29E-01             | 0.001504          | 0.028595               | interaction    | 0.803313              | 1832.4                              | 19.20%              | 361.3                               | 33.40%                 | 153.8                               | 73.90%              | 594.4                               | 108.60%                | 96.3                                | 73.50%              | 137.6                            | 95.10%                 |
| 26              | nlpB             | P0A903          | 36.8                                                   | 37.75                       | 303                                   | 0.001345         | 0.542013             | 0.001216          | 0.005629               | interaction    | 0.640397              | 1602.4                              | 26.40%              | 268.2                               | 16.50%                 | 207.8                               | 85.50%              | 709.3                               | 92.80%                 | 123.6                               | 59.00%              | 104                              | 15.50%                 |
| 27              | yhbG             | P0A9V1          | 26.8                                                   | 32.4                        | 251                                   |                  |                      |                   |                        | qualitative    |                       | 0.00%                               | 0.00%               | 0.00%                               | 1041.5                 | 17.10%                              | 902.7               | 43.00%                              | 0.00%                  | 0.00%                               | 0.00%               | 0.00%                            |                        |
| 28              | mscS             | P0C0S1          | 30.9                                                   | 28.18                       | 279                                   | 0.014781         | 0.340582             | 0.003325          | 0.299331               | strain only    | 0.397178              | 451.3                               | 16.20%              | 370.1                               | 31.50%                 | 973.6                               | 4.50%               | 674.9                               | 60.70%                 | 250.1                               | 11.80%              | 326.1                            | 44.90%                 |
| 29              | nlpB             | P0A903          | 36.8                                                   | 34.49                       | 247                                   |                  |                      |                   |                        | qualitative    |                       | 0.00%                               | 0.00%               | 0.00%                               | 3327                   | 52.70%                              | 3100.5              | 45.50%                              | 0.00%                  | 0.00%                               | 0.00%               | 0.00%                            |                        |
| 30              | pnp              | p05055          | 77.1                                                   | 99.72                       | 258                                   | 7.83E-03         | 4.00E-01             | 0.003874          | 0.046738               | interaction    | 0.426665              | 584.6                               | 40.40%              | 1038.8                              | 22.70%                 | 3026.7                              | 31.80%              | 1751.6                              | 65.90%                 | 1963.9                              | 35.70%              | 1185.8                           | 34.90%                 |
| 31              | cyoB             | P0AB18          | 74.4                                                   | 44.61                       | 210                                   | 2.07E-07         | 6.32E-01             | 1.58E-08          | 0.457104               | strain only    | 0.402559              | 130074.8                            | 28.80%              | 108380.6                            | 29.00%                 | 4160.3                              | 23.10%              | 5083.3                              | 70.10%                 | 49514.3                             | 39.20%              | 74088.4                          | 34.20%                 |
| 32              | yaeT             | P0A940          | 90.6                                                   | 102.12                      | 295                                   | 0.000409         | 0.586262             | 0.000104          | 0.023437               | interaction    | 0.686764              | 6785.1                              | 21.20%              | 2385.5                              | 28.60%                 | 370.6                               | 84.10%              | 1517.2                              | 96.40%                 | 346.3                               | 39.90%              | 371.9                            | 35.60%                 |
| 33              | yrbD             | P64604          | 19.6                                                   | 105.89                      | 315                                   |                  |                      |                   |                        | qualitative    |                       | 0.00%                               | 0.00%               | 0.00%                               | 503.5                  | 30.40%                              | 1218.9              | 66.50%                              | 303.9                  | 108.50%                             | 127.1               | 68.50%                           |                        |
| 34              | nuoG             | P33602          | 100.2                                                  | 124.69                      | 228                                   |                  |                      |                   |                        | qualitative    |                       | 885                                 | 21.70%              | 1128.3                              | 72.90%                 | 2031                                | 73.20%              | 0.00%                               | 0.00%                  | 3723.6                              | 109.30%             | 5944.4                           | 158.60%                |
| 35              | cydA             | P0ABJ9          | 58.2                                                   | 42.12                       | 146                                   | 0.000013         | 1.53E-02             | 6.44E-06          | 0.001416               | interaction    | 0.39045               | 827.5                               | 23.30%              | 5432.7                              | 62.00%                 | 9919.3                              | 34.20%              | 6966.2                              | 32.60%                 | 1129.9                              | 12.20%              | 1393.5                           | 41.50%                 |
| 36              | dppF             | P37313          | 37.9                                                   | 39.56                       | 181                                   |                  |                      |                   |                        | qualitative    |                       | 0.00%                               | 289.3               | 70.70%                              | 0.00%                  | 0.00%                               | 0.00%               | 0.00%                               | 712.9                  | 67.00%                              | 695.4               | 77.40%                           |                        |
| 37              | dppD             | P0AAG0          | 35.8                                                   | 38.01                       | 182                                   |                  |                      |                   |                        | qualitative    |                       | 0.00%                               | 265.4               | 109.70%                             | 0.00%                  | 0.00%                               | 0.00%               | 0.00%                               | 510.3                  | 69.50%                              | 379.1               | 19.90%                           |                        |
| 38              | dppB             | P0AEF8          | 37.5                                                   | 32.69                       | 180                                   |                  |                      |                   |                        | qualitative    |                       | 1381.1                              | 8.20%               | 0.00%                               | 0.00%                  | 0.00%                               | 0.00%               | 0.00%                               | 298.1                  | 23.10%                              | 452.5               | 49.20%                           |                        |
| 39              | gatC             | P69831          | 48.4                                                   | 35.91                       | 147                                   |                  |                      |                   |                        | qualitative    |                       | 0.00%                               | 14187.6             | 54.60%                              | 18644                  | 21.30%                              | 4980.7              | 77.90%                              | 4576.7                 | 98.80%                              | 2696.7              | 112.50%                          |                        |
| 40              | oppD             | P76027          | 37.2                                                   | 38.91                       | 183                                   |                  |                      |                   |                        | qualitative    |                       | 0.00%                               | 426.4               | 37.30%                              | 2957.7                 | 24.80%                              | 16127.3             | 81.80%                              | 410.4                  | 36.00%                              | 221.7               | 61.80%                           |                        |
| 41              | oppB             | P0AFH2          | 33.4                                                   | 28.7                        | 182                                   |                  |                      |                   |                        | qualitative    |                       | 0.00%                               | 0.00%               | 0.00%                               | 1225.9                 | 56.90%                              | 449.1               | 71.40%                              | 617.8                  | 86.00%                              | 327.9               | 80.60%                           |                        |
| 42              | pntA             | P07001          | 54.9                                                   | 43.57                       | 161                                   | 9.20E-06         | 0.8638               | 2.74E-06          | 0.001073               | interaction    | 0.295906              | 856.9                               | 29.90%              | 1976.5                              | 7.50%                  | 8092.5                              | 23.70%              | 3435.5                              | 21.40%                 | 1416.6                              | 38.40%              | 1256.8                           | 27.50%                 |
| 43              | ppiD             | P0ADY1          | 68.1                                                   | 77.01                       | 200                                   | 9.97E-03         | 5.25E-03             | 0.040996          | 0.110086               | beh and strain | 0.445697              | 677.2                               | 23.90%              | 2615.6                              | 16.40%                 | 2095.9                              | 21.70%              | 3874.9                              | 31.70%                 | 2054.3                              | 68.30%              | 2473.6                           | 54.70%                 |
| 44              | frdA             | P00363          | 66                                                     | 79.42                       | 156                                   |                  |                      |                   |                        | qualitative    |                       | 0.00%                               | 361.9               | 34.70%                              | 3706.9                 | 26.70%                              | 6966.8              | 138.60%                             | 241.9                  |                                     |                     |                                  |                        |



**Supplementary Table 2: Comparative analysis and mass spectrometry identification of spots from 2D gels of whole cell lysates of membrane protein-overexpressing cells and control cells.**

Coomassie stained 2D maps of whole cell lysates (Supplementary figure 3) For each spot a two-way ANOVA was performed on log transformed data as described previously (Supplementary table 1; Klepsch, M., Schlegel, S., Wickstrom, D., Friso, G., van Wijk, K. J., Persson, J. O., de Gier, J. W. & Wagner, S. (2008). Immobilization of the first dimension in 2D blue native/SDS-PAGE allows the relative quantification of membrane proteomes. *Methods* 46, 48-53; Wagner, S., Klepsch, M. M., Schlegel, S., Appel, A., Draheim, R., Tarry, M., Hogbom, M., van Wijk, K. J., Slobodm, D. J., Persson, J. O. & de Gier, J. W. (2008). Tuning Escherichia coli for membrane protein overexpression. *Proc Natl Acad Sci U S A* 105, 14371-6). with treatment and strain as factors. Significance was determined using a two-way ANOVA with treatment (i.e., hKDEL-GFP overexpression) and strain as factors, resulting in a p-value for each spot. Spots with missing data in all replicates, for some combination of treatment and strain, were excluded from the ANOVA-analysis. The effect of those 75 spots was "qualitative". Significant effects for "treatment", "strain", "treatment and strain" (no interaction), and "interaction" were found for 154 spots. Non-identifiable proteins were excluded from the data set. In the end, 257 significantly changed proteins in 227 spots remained. A grouping of the spots on the kind of effect was done. The effects were "treatment", "strain", "treatment and strain (no interaction)" and "interaction". Furthermore, matrix and/or auto-proteolytic trypsin fragments were removed by the software Peak Eraser v2.01 (Lighthouse data). Shown are only spots that could be identified by MS.

Abbreviations: acc., accession; seq., sequence; pep., peptides; quant., quantitation.

| spot<br>Nr (a) | gene name(s) (b) | Swiss Prot acc. | ID ref. (c) | MALDI-TOF MS      |                     |                               |                                   | predicted<br>MW (kDa)<br>(precursor<br>mature) (h) | predicted<br>pI<br>(precursor/<br>mature) (i) | observed<br>MW<br>(kDa) (j) | observed<br>pI<br>(k) | ANOVA            |                      |                   |                        |                |                       | BL21(DE3)pLysS                      |                        |                                      | C41(DE3)                |                                     |                        | C43(DE3)                             |                         |                                     |                        |                                      |                         |
|----------------|------------------|-----------------|-------------|-------------------|---------------------|-------------------------------|-----------------------------------|----------------------------------------------------|-----------------------------------------------|-----------------------------|-----------------------|------------------|----------------------|-------------------|------------------------|----------------|-----------------------|-------------------------------------|------------------------|--------------------------------------|-------------------------|-------------------------------------|------------------------|--------------------------------------|-------------------------|-------------------------------------|------------------------|--------------------------------------|-------------------------|
|                |                  |                 |             | mass:score<br>(d) | % seq.<br>cover (e) | Nr. of<br>matched<br>pep. (f) | Nr. of un-<br>matched<br>pep. (g) |                                                    |                                               |                             |                       | p-value<br>model | p-value<br>treatment | p-value<br>strain | p-value<br>interaction | effect         | standard<br>deviation | quant.<br>value<br>(control)<br>(l) | CV<br>(control)<br>(m) | quant.<br>value<br>(KDEL-<br>OE) (n) | CV<br>(KDEL-<br>OE) (o) | quant.<br>value<br>(control)<br>(p) | CV<br>(control)<br>(q) | quant.<br>value<br>(KDEL-<br>OE) (r) | CV<br>(KDEL-<br>OE) (s) | quant.<br>value<br>(control)<br>(t) | CV<br>(control)<br>(u) | quant.<br>value<br>(KDEL-<br>OE) (v) | CV<br>(KDEL-<br>OE) (w) |
|                |                  |                 |             |                   |                     |                               |                                   |                                                    |                                               |                             |                       |                  |                      |                   |                        |                |                       |                                     |                        |                                      |                         |                                     |                        |                                      |                         |                                     |                        |                                      |                         |
| 1              | rpIL             | POA7K2          |             | 76                | 71                  | 6                             | 27                                | 12.3                                               | 4.60                                          | 11.92                       | 4.42                  | 0.0176029        | 0.0137292            | 0.0197125         | 0.62139                | treat + strain | 0.4481                | 25086                               | 2.20%                  | 39567.6                              | 13.60%                  | 13492.4                             | 52.50%                 | 29767.1                              | 49.50%                  | 13272.2                             | 40.50%                 | 18658.5                              | 35.80%                  |
| 2              | rpII             | POA7K2          |             | 64                | 43                  | 22                            | 12.3                              | 4.6                                                | 11.82                                         | 4.51                        | 0.0029188             | 0.0005539        | 0.0554637            | 0.401196          | qualitative            | 0.5143         | 25086                 | 2.20%                               | 39567.6                | 13.60%                               | 13492.4                 | 52.50%                              | 29767.1                | 49.50%                               | 13272.2                 | 40.50%                              | 18658.5                | 35.80%                               |                         |
| 3              | rpA              | POA7R5          |             | 58                | 47                  | 5                             | 19                                | 11.7                                               | 9.68                                          | 12.35                       | 4.35                  | 0.0037942        | 0.0440551            | 0.0012795         | 0.335613               | treat + strain | 1.2073                | 90.7                                | 103.70%                | 282.3                                | 29.30%                  | 21.7                                | 93.30%                 | 312.8                                | 114.80%                 | 579.9                               | 34.80%                 | 693.3                                | 6.80%                   |
| 4              | rpC              | P61949          |             | 69                | 39                  | 4                             | 14                                | 19.7                                               | 4.21                                          | 20.32                       | 4.35                  | 0.0037942        | 0.0440551            | 0.0012795         | 0.335613               | treat + strain | 1.2073                | 90.7                                | 103.70%                | 282.3                                | 29.30%                  | 21.7                                | 93.30%                 | 312.8                                | 114.80%                 | 579.9                               | 34.80%                 | 693.3                                | 6.80%                   |
| 5              | rpD              | POA438          |             | 68                | 42                  | 6                             | 20                                | 22.2                                               | 9.9                                           | 24.21                       | 4.32                  | 4.46E-06         | 2.54E-07             | 0.0039422         | 0.809972               | treat + strain | 0.177                 | 1260                                | 23.30%                 | 2245.5                               | 9.80%                   | 825                                 | 14.20%                 | 1653.4                               | 22.40%                  | 1048.6                              | 19.50%                 | 1857.4                               | 8.40%                   |
| 6              | rpE              | POA5B5          | OE(1)       | 71                | 20                  | 6                             | 13                                | 36.5                                               | 4.98                                          | 36.18                       | 4.29                  | 0.0073359        | 0.76299              | 0.0102833         | 0.023961               | interaction    | 0.655                 | 59.8                                | 70.50%                 | 262.9                                | 81.40%                  | 415.4                               | 28.70%                 | 159.4                                | 77.10%                  | 478.3                               | 1.80%                  | 454.3                                | 47.40%                  |
| 7              | rpF              | POA7Z4          |             | 86                | 29                  | 6                             | 23                                | 41.9                                               | 39.9                                          | 47.24                       | 4.4                   | 0.0000127        | 2.59E-06             | 0.0000801         | 0.03479                | interaction    | 0.1814                | 483.3                               | 23.30%                 | 1167.4                               | 25.70%                  | 891.6                               | 4.80%                  | 1325.3                               | 16.10%                  | 941.3                               | 9.80%                  | 1400.4                               | 22.60%                  |
| 8              | rpG              | P77774          |             | 71                | 20                  | 6                             | 23                                | 41.9                                               | 39.9                                          | 47.24                       | 4.4                   | 0.0000127        | 2.59E-06             | 0.0000801         | 0.03479                | interaction    | 0.1814                | 483.3                               | 23.30%                 | 1167.4                               | 25.70%                  | 891.6                               | 4.80%                  | 1325.3                               | 16.10%                  | 941.3                               | 9.80%                  | 1400.4                               | 22.60%                  |
| 9              | hemX             | PO9127          | 2           | 42                | 9                   | 6                             | 14                                | 4.9                                                | 4.68                                          | 47.19                       | 4.46                  | 0.0000216        | 0.0005211            | 0.0000586         | 0.204164               | treat + strain | 0.2121                | 1578.7                              | 19.80%                 | 1204                                 | 11.90%                  | 1020.9                              | 10.80%                 | 772.5                                | 32.30%                  | 926                                 | 23.20%                 | 485.1                                | 22.90%                  |
| 10             | rrr              | P69783          |             | 109               | 58                  | 6                             | 14                                | 18.3                                               | 4.73                                          | 19.59                       | 4.6                   | 0.0019989        | 0.9378253            | 0.0003864         | 0.324994               | strain         | 0.3647                | 12752                               | 1.40%                  | 9215.6                               | 16.70%                  | 4790.8                              | 33.20%                 | 6488.8                               | 28.90%                  | 4078.8                              | 60.80%                 | 3664.1                               | 10.90%                  |
| 11             | ruI              | POACD4          |             | 61                | 42                  | 5                             | 22                                | 13.8                                               | 4.82                                          | 15.45                       | 4.69                  | 0.0117079        | 0.0203946            | 0.3805878         | 0.037552               | interaction    | 0.5676                | 419.5                               | 122.30%                | 1541.4                               | 20.20%                  | 611                                 | 50.70%                 | 1134.3                               | 13.30%                  | 924.4                               | 30.80%                 | 1004.7                               | 21.70%                  |
| 12             | ompX             | POA917          |             | 82                | 57                  | 6                             | 21                                | 16.6                                               | 16.4                                          | 6.56                        | 3.3                   | 8.77E-06         | 6.07E-06             | 0.0000103         | 0.701524               | treat + strain | 0.3068                | 1544.1                              | 56.10%                 | 4208.1                               | 46.10%                  | 3615.3                              | 7.90%                  | 7706.8                               | 20.90%                  | 4103.7                              | 15.80%                 | 9905.2                               | 37.40%                  |
| 13             | rrr              | P69783          |             | 79                | 43                  | 7                             | 13                                | 18.1                                               | 4.73                                          | 22.1                        | 4.63                  | 0.0008539        | 0.0910952            | 0.0002013         | 0.04779                | interaction    | 0.6041                | 618.8                               | 67.70%                 | 53.5                                 | 2.10%                   | 618.8                               | 34.60%                 | 1061.6                               | 37.50%                  | 780.5                               | 23.40%                 | 988.8                                | 57.40%                  |
| 14             | pal              | POA912          |             | 58                | 38                  | 5                             | 13                                | 18.8                                               | 16.6                                          | 6.29                        | 5.50                  | 0.0008539        | 0.0910952            | 0.0002013         | 0.04779                | interaction    | 0.6041                | 618.8                               | 67.70%                 | 53.5                                 | 2.10%                   | 618.8                               | 34.60%                 | 1061.6                               | 37.50%                  | 780.5                               | 23.40%                 | 988.8                                | 57.40%                  |
| 13             | rrr              | P69783          |             | 72                | 34                  | 6                             | 26                                | 18.1                                               | 4.73                                          | 19.69                       | 4.51                  | 0.0167197        | 0.1512975            | 0.0133357         | 0.030679               | interaction    | 0.7023                | 1189                                | 14.60%                 | 3364.4                               | 10.80%                  | 483.5                               | 89.50%                 | 1346.9                               | 35.10%                  | 543.4                               | 52.40%                 | 716.3                                | 59.70%                  |
| 14             | metQ             | P28635          |             | 120               | 47                  | 9                             | 15                                | 25.4                                               | 27.3                                          | 13.93                       | 4.63                  | 0.0187016        | 0.5343886            | 0.0023213         | 0.822008               | strain         | 0.713                 | 2374.8                              | 67.80%                 | 3302.5                               | 129.90%                 | 7929.3                              | 7.20%                  | 8511.4                               | 8.20%                   | 6712.2                              | 9.60%                  | 5441                                 | 45.00%                  |
| 16             | metQ             | P28635          |             | 137               | 63                  | 9                             | 19                                | 29.4                                               | 27.2                                          | 13.94                       | 4.63                  | 0.0187016        | 0.5343886            | 0.0023213         | 0.822008               | strain         | 0.713                 | 2374.8                              | 67.80%                 | 3302.5                               | 129.90%                 | 7929.3                              | 7.20%                  | 8511.4                               | 8.20%                   | 6712.2                              | 9.60%                  | 5441                                 | 45.00%                  |
| 17             | potD             | POAFK9          |             | 128               | 40                  | 11                            | 8                                 | 38.9                                               | 36.5                                          | 5.24                        | 4.86                  | 0.0000216        | 0.0005211            | 0.0000586         | 0.204164               | treat + strain | 0.2121                | 1578.7                              | 19.80%                 | 1204                                 | 11.90%                  | 1020.9                              | 10.80%                 | 772.5                                | 32.30%                  | 926                                 | 23.20%                 | 485.1                                | 22.90%                  |
| 17             | ripB             | POA903          |             | 100               | 36                  | 9                             | 8                                 | 36.8                                               | 34.4                                          | 5.34                        | 4.96                  | 0.0000216        | 0.0005211            | 0.0000586         | 0.204164               | treat + strain | 0.2121                | 1578.7                              | 19.80%                 | 1204                                 | 11.90%                  | 1020.9                              | 10.80%                 | 772.5                                | 32.30%                  | 926                                 | 23.20%                 | 485.1                                | 22.90%                  |
| 18             | ripB             | POA903          |             | 100               | 36                  | 9                             | 8                                 | 36.8                                               | 34.4                                          | 5.34                        | 4.96                  | 0.0000216        | 0.0005211            | 0.0000586         | 0.204164               | treat + strain | 0.2121                | 1578.7                              | 19.80%                 | 1204                                 | 11.90%                  | 1020.9                              | 10.80%                 | 772.5                                | 32.30%                  | 926                                 | 23.20%                 | 485.1                                | 22.90%                  |
| 18             | ripB             | POA903          |             | 100               | 36                  | 9                             | 8                                 | 36.8                                               | 34.4                                          | 5.34                        | 4.96                  | 0.0000216        | 0.0005211            | 0.0000586         | 0.204164               | treat + strain | 0.2121                | 1578.7                              | 19.80%                 | 1204                                 | 11.90%                  | 1020.9                              | 10.80%                 | 772.5                                | 32.30%                  | 926                                 | 23.20%                 | 485.1                                | 22.90%                  |
| 18             | ripB             | POA903          |             | 100               | 36                  | 9                             | 8                                 | 36.8                                               | 34.4                                          | 5.34                        | 4.96                  | 0.0000216        | 0.0005211            | 0.0000586         | 0.204164               | treat + strain | 0.2121                | 1578.7                              | 19.80%                 | 1204                                 | 11.90%                  | 1020.9                              | 10.80%                 | 772.5                                | 32.30%                  | 926                                 | 23.20%                 | 485.1                                | 22.90%                  |
| 19             | atpA             | POAB80          |             | 158               | 30                  | 15                            | 18                                | 55.2                                               | 5.8                                           | 36.17                       | 4.71                  | 0.0157358        | 0.0101306            | 0.5871317         | 0.009415               | interaction    | 0.0157                | 2886.1                              | 76.00%                 | 430.6                                | 130.60%                 | 1007.4                              | 35.10%                 | 947.5                                | 52.50%                  | 1117.3                              | 34.10%                 | 1102                                 | 10.30%                  |
| 20             | fszC             | POA9A6          |             | 146               | 40                  | 12                            | 9                                 | 40.3                                               | 4.65                                          | 38.31                       | 4.53                  | 0.0201161        | 0.8516622            | 0.0044683         | 0.242281               | strain         | 0.4124                | 2340.5                              | 37.30%                 | 2803.6                               | 22.00%                  | 999.4                               | 41.70%                 | 1347.2                               | 41.90%                  | 2413.8                              | 23.50%                 | 1732.2                               | 39.30%                  |
| 20             | sucC             | POA386          |             | 51                | 18                  | 6                             | 9                                 | 41.4                                               | 5.37                                          | 38.31                       | 4.53                  | 0.0201161        | 0.8516622            | 0.0044683         | 0.242281               | strain         | 0.4124                | 2340.5                              | 37.30%                 | 2803.6                               | 22.00%                  | 999.4                               | 41.70%                 | 1347.2                               | 41.90%                  | 2413.8                              | 23.50%                 | 1732.2                               | 39.30%                  |
| 21             | gls              | POA6F5          |             | 117               | 18                  | 10                            | 5                                 | 57.2                                               | 4.95                                          | 38.61                       | 4.76                  | 0.0000148        | 6.39E-06             | 0.00252           | 0.003922               | interaction    | 0.1948                | 855.3                               | 24.10%                 | 923.8                                | 24.20%                  | 543.8                               | 18.50%                 | 1048                                 | 11.20%                  | 423.4                               | 18.80%                 | 991.6                                | 16.80%                  |
| 21             | atpA             | POAB80          |             | 70                | 20                  | 8                             | 20                                | 55.2                                               | 5.8                                           | 36.17                       | 4.71                  | 0.0035041        | 0.0133333            | 0.0018408         | 0.741058               | treat + strain | 0.5808                | 551.7                               | 2.60%                  | 876.8                                | 22.60%                  | 233.1                               | 136.60%                | 274.8                                | 49.90%                  | 165.4                               | 23.20%                 | 430.7                                | 21.30%                  |
| 22             | gls              | POA6F5          |             | 107               | 62                  | 9                             | 29                                | 18.7                                               | 5.72                                          | 20.01                       | 4.81                  | 0.0105015        | 0.0362913            | 0.0044085         | 0.447256               | treat + strain | 0.8387                | 262.6                               | 48.90%                 | 1023                                 | 50.40%                  | 2260.3                              | 35.80%                 | 2670.1                               | 13.60%                  | 719.6                               | 86.80%                 | 1408.4                               | 77.50%                  |
| 23             | pal              | POA912          |             | 63                | 50                  | 6                             | 32                                | 18.8                                               | 16.6                                          | 6.29                        | 5.50                  | 0.0105015        | 0.0362913            | 0.0044085         | 0.447256               | treat + strain | 0.8387                | 262.6                               | 48.90%                 | 1023                                 | 50.40%                  | 2260.3                              | 35.80%                 | 2670.1                               | 13.60%                  | 719.6                               | 86.80%                 | 1408.4                               | 77.50%                  |
| 23             | bfr              | POA912          |             | 57                | 47                  | 7                             | 31                                | 18.5                                               | 4.69                                          | 20.01                       | 4.81                  | 0.0105015        | 0.0362913            | 0.0044085         | 0.447256               | treat + strain | 0.8387                | 262.6                               | 48.90%                 | 1023                                 | 50.40%                  | 2260.3                              | 35.80%                 | 2670.1                               | 13.60%                  | 719.6                               | 86.80%                 | 1408.4                               | 77.50%                  |
| 24             | appA             | POA7A9          |             | 104               | 42                  | 8                             | 18                                | 19.7                                               | 5.03                                          | 21.35                       | 4.84                  | 0.0036903        | 0.7869355            | 0.0005432         | 0.287343               | strain         | 0.2913                | 2600.6                              | 20.10%                 | 2143.8                               | 28.80%                  | 1185.6                              | 20.70%                 | 1586.8                               | 13.60%                  | 1079.5                              | 23.60%                 | 1155.3                               | 38.90%                  |
| 24             | appA             | POA7A9          |             | 104               | 42                  | 8                             | 18                                | 19.7                                               | 5.03                                          | 21.35                       | 4.84                  | 0.0036903        | 0.7869355            | 0.0005432         | 0.287343               | strain         | 0.2913                | 2600.6                              | 20.10%                 | 2143.8                               | 28.80%                  | 1185.6                              | 20.70%                 | 1586.8                               | 13.60%                  | 1079.5                              | 23.60%                 | 1155.3                               | 38.90%                  |
| 25             | potD             | POAFK9          |             | 105               | 38                  | 10                            | 17                                | 38.9                                               | 36.5                                          | 5.24                        | 4.86                  | 0.0000216        | 0.0005211            | 0.0000586         | 0.204164               | treat + strain | 0.2121                | 1578.7                              | 19.80%                 | 1204                                 | 11.90%                  | 1020.9                              | 10.80%                 | 772.5                                | 32.30%                  | 926                                 | 23.20%                 | 485.1                                | 22.90%                  |
| 25             | ripB             | POA903          |             | 75                | 31                  | 8                             | 17                                | 36.8                                               | 34.4                                          | 5.34                        | 4.96                  | 0.0000216        | 0.0005211            | 0.0000586         | 0.204164               | treat + strain | 0.2121                | 1578.7                              | 19.80%                 | 1204                                 | 11.90%                  | 1020.9                              | 10.80%                 | 772.5                                | 32.30%                  | 926                                 | 23.20%                 | 4                                    |                         |

|    |              |         |        |           |          |       |           |           |           |           |           |                |           |           |                |         |         |         |        |         |         |         |         |         |         |         |        |         |
|----|--------------|---------|--------|-----------|----------|-------|-----------|-----------|-----------|-----------|-----------|----------------|-----------|-----------|----------------|---------|---------|---------|--------|---------|---------|---------|---------|---------|---------|---------|--------|---------|
| 62 | rmpF         | POA358  | 28     | 15.7      | 4.93     | 18.49 | 5.11      | 0.0006322 | 0.2359284 | 0.0001131 | 0.094653  | strain         | 0.7083    | 463.7     | 58.10%         | 0.00%   | 855.1   | 11.30%  | 212.2  | 121.20% | 566.2   | 32.50%  | 155.4   | 118.70% |         |         |        |         |
| 63 | ompX         | POA717  | 29     | 18.9164   | 6.5653   | 19.25 | 5.14      | 0.0004198 | 0.0017285 | 0.598634  | 0.039482  | interaction    | 1.2165    | 263.4     | 144.60%        | 5467.7  | 14.00%  | 993.4   | 80.00% | 2681.8  | 72.10%  | 1242.1  | 71.70%  | 3042.3  | 67.70%  |         |        |         |
| 64 | gal          | POA912  | 29     | 18.7716   | 6.2935   | 19.25 | 5.14      | 0.0004198 | 0.0017285 | 0.598634  | 0.039482  | interaction    | 1.2165    | 263.4     | 144.60%        | 5467.7  | 14.00%  | 993.4   | 80.00% | 2681.8  | 72.10%  | 1242.1  | 71.70%  | 3042.3  | 67.70%  |         |        |         |
| 64 | ylgF         | POA474  | 38     | 13.5      | 5.36     | 13.45 | 5.17      | 0.0018785 | 0.0001323 | 0.1153498 | 0.182339  | treat          | 0.4792    | 2893.3    | 13.10%         | 1021.7  | 116.90% | 3084.7  | 11.60% | 1932.6  | 30.60%  | 2931.2  | 23.30%  | 1025.4  | 36.40%  |         |        |         |
| 65 | rpsD         | POA758  | 119    | 48        | 10       | 4     | 23.5      | 10.05     | 23.73     | 5.09      | 0.0002019 | 0.0109212      | 0.0003548 | 0.283522  | treat + strain | 0.5553  | 208.9   | 129.00% | 446.3  | 21.10%  | 759.4   | 26.10%  | 1101.1  | 29.60%  | 851.6   | 14.00%  | 1321.1 | 20.70%  |
| 65 | sspA         | POA3A3  | 71     | 41        | 6        | 4     | 24.3      | 5.22      | 23.73     | 5.09      | 0.0002019 | 0.0109212      | 0.0003548 | 0.283522  | treat + strain | 0.5553  | 208.9   | 129.00% | 446.3  | 21.10%  | 759.4   | 26.10%  | 1101.1  | 29.60%  | 851.6   | 14.00%  | 1321.1 | 20.70%  |
| 65 | rplC         | POA438  | 56     | 37        | 5        | 4     | 22.2      | 9.9       | 23.73     | 5.09      | 0.0002019 | 0.0109212      | 0.0003548 | 0.283522  | treat + strain | 0.5553  | 208.9   | 129.00% | 446.3  | 21.10%  | 759.4   | 26.10%  | 1101.1  | 29.60%  | 851.6   | 14.00%  | 1321.1 | 20.70%  |
| 66 | ylgE         | P2589A  | 82     | 42        | 7        | 20    | 26.8      | 5.35      | 15.37     | 5.19      | 0.0012046 | 0.0021102      | 0.1456306 | 0.08956   | interaction    | 0.8706  | 1735.8  | 6.20%   | 2092.2 | 34.00%  | 1428.3  | 6.20%   | 489.8   | 109.1   | 45.00%  |         |        |         |
| 67 | arl          | P30859  | OE(37) | 26.9225   | 0.579532 | 24.05 | 5.14      | 2.70E-07  | 7.90E-08  | 0.0695896 | 3.14E-05  | interaction    | 0.1881    | 4844.4    | 20.50%         | 1199.2  | 23.00%  | 2317.6  | 11.50% | 1947.9  | 16.00%  | 2465.9  | 21.00%  | 1440.9  | 19.20%  |         |        |         |
| 68 | dps          | POA8T2  | 97     | 58        | 8        | 23    | 18.6      | 5.72      | 21.32     | 5.18      | 0.0000334 | 5.12E-07       | 0.2831929 | 0.993743  | treat          | 0.2029  | 1035.5  | 19.10%  | 2042.8 | 31.40%  | 926.6   | 21.70%  | 1800.1  | 15.60%  | 871.1   | 16.50%  | 1673   | 15.60%  |
| 69 | apt          | P69503  | 144    | 75        | 8        | 5     | 19.9      | 5.26      | 22.63     | 5.2       | 1.14E-06  | 3.42E-08       | 0.0026112 | 0.994825  | treat + strain | 0.2074  | 1573    | 31.60%  | 3483.5 | 18.70%  | 971.3   | 12.10%  | 2248.5  | 21.40%  | 1120.2  | 10.90%  | 2516.7 | 7.70%   |
| 70 | rpk          | POA763  | 80     | 44        | 6        | 6     | 15.3      | 5.55      | 15.37     | 5.19      | 0.0000000 | 0.0000000      | 0.0000000 | 0.0000000 | qualitative    | 0.0000  | 113.9   | 2.50%   | 0.00%  | 0.00%   | 679.9   | 44.20%  | 835.6   | 74.30%  | 139.2   | 139.00% | 79.3   | 73.40%  |
| 71 | rplD         | POA4C4  | 64     | 29        | 6        | 6     | 14.4      | 11.05     | 15.37     | 5.19      | 0.0000000 | 0.0000000      | 0.0000000 | 0.0000000 | qualitative    | 0.0000  | 1530.4  | 54.30%  | 0.00%  | 0.00%   | 671.8   | 25.20%  | 0.00%   | 0.00%   | 531.2   | 48.80%  | 110.6  | 101.00% |
| 72 | trxB         | POA9P4  | 80     | 28        | 7        | 14    | 20.5      | 5.3       | 34.67     | 5.16      | 0.0009718 | 0.0060978      | 0.0004077 | 0.836241  | treat + strain | 0.4649  | 1525.8  | 37.30%  | 2408.2 | 24.60%  | 437.9   | 38.40%  | 881.9   | 55.60%  | 861.1   | 13.10%  | 2054.5 | 50.80%  |
| 73 | isf          | POA6P1  | 167    | 63        | 11       | 5     | 30.4      | 5.22      | 30.7      | 5.16      | 0.0000815 | 6.19E-06       | 0.0167327 | 0.955566  | treat + strain | 0.2729  | 1995.9  | 45.30%  | 2614.6 | 3.00%   | 937.5   | 24.00%  | 2186.5  | 6.10%   | 752.8   | 13.90%  | 1998.9 | 24.40%  |
| 74 | rpkB         | P06999  | 183    | 63        | 16       | 24    | 32.5      | 5.25      | 32.61     | 5.21      | 0.0047353 | 0.0471011      | 0.1170659 | 0.004843  | interaction    | 0.3111  | 2378.6  | 60.20%  | 1221.7 | 46.40%  | 1287.1  | 6.30%   | 1569.7  | 5.30%   | 1326.4  | 15.10%  | 1260.9 | 6.50%   |
| 75 | pikB         | P06999  | 183    | 63        | 16       | 24    | 32.5      | 5.25      | 31.96     | 5.21      | 0.0063570 | 0.0011663      | 0.0573708 | 0.776219  | treat          | 0.1566  | 1891.5  | 41.30%  | 1303.3 | 29.00%  | 1781.2  | 10.60%  | 882.4   | 65.70%  | 1583.8  | 14.60%  | 816.9  | 26.40%  |
| 76 | malE         | POAEX9  | 236    | 51        | 18       | 17    | 43.4/40.7 | 0.536/22  | 38.27     | 5.17      | 0.005323  | 0.0034548      | 0.0033387 | 0.459852  | treat + strain | 0.382   | 3894.2  | 10.40%  | 2081.1 | 17.20%  | 2204.4  | 23.10%  | 2001.5  | 34.80%  | 1594.6  | 30.50%  | 1240.6 | 55.60%  |
| 77 | agg          | P19926  | OE(41) | 46.0436   | 5.48538  | 42.02 | 5.22      | 2.58E-06  | 0.0002959 | 6.91E-06  | 0.458603  | treat + strain | 0.3031    | 2004.9    | 18.50%         | 1128.6  | 17.30%  | 963.3   | 12.90% | 567.1   | 65.40%  | 809.1   | 30.60%  | 308.7   | 24.50%  |         |        |         |
| 78 | malE         | POAEX9  | OE(35) | 43.4407   | 5.53522  | 37.93 | 5.09      | 2.03E-13  | 2.10E-15  | 0.0461396 | 0.000389  | interaction    | 0.1434    | 81795.9   | 4.50%          | 11088.6 | 18.20%  | 69198.9 | 19.70% | 19738   | 16.30%  | 72746.1 | 15.20%  | 14385.8 | 8.20%   |         |        |         |
| 79 | dcbB         | POA6K6  | OE(26) | 44.7      | 5.11     | 32.01 | 5.04      | 0.000365  | 9.85E-06  | 0.2611771 | 0.020743  | treat          | 0.6554    | 575.4     | 58.80%         | 3066    | 0.20%   | 470.5   | 82.40% | 1343.1  | 18.90%  | 237.3   | 78.40%  | 2489.2  | 25.90%  |         |        |         |
| 80 | dpgQ         | P30909  | 66     | 25        | 9        | 29    | 46.2/43.4 | 0.575/37  | 46.73     | 5.1       | 7.13E-06  | 0.4933341      | 0.0007045 | 0.0003965 | interaction    | 0.6261  | 697     | 25.60%  | 194.1  | 82.70%  | 19.6    | 46.20%  | 21.9    | 109.30% | 663.7   | 41.10%  | 216.9  | 52.40%  |
| 81 | atpD         | POA8A4  | 162    | 54        | 14       | 7     | 50.2      | 4.9       | 52.97     | 5.14      | 0.0003383 | 0.0001128      | 0.2702232 | 0.188798  | treat          | 0.4637  | 493.9   | 87.50%  | 1089.3 | 16.20%  | 334.3   | 33.30%  | 725.2   | 27.10%  | 192     | 31.40%  | 1040.2 | 39.80%  |
| 81 | lpdA         | POA9P0  | 145    | 32        | 14       | 7     | 50.6      | 5.79      | 52.97     | 5.14      | 0.0003383 | 0.0001128      | 0.2702232 | 0.188798  | treat          | 0.4637  | 493.9   | 87.50%  | 1089.3 | 16.20%  | 334.3   | 33.30%  | 725.2   | 27.10%  | 192     | 31.40%  | 1040.2 | 39.80%  |
| 81 | trxA         | POA9P0  | 145    | 32        | 14       | 7     | 50.6      | 5.79      | 52.97     | 5.14      | 0.0003383 | 0.0001128      | 0.2702232 | 0.188798  | treat          | 0.4637  | 493.9   | 87.50%  | 1089.3 | 16.20%  | 334.3   | 33.30%  | 725.2   | 27.10%  | 192     | 31.40%  | 1040.2 | 39.80%  |
| 83 | cpdB         | P08331  | OE(44) | 63.8905   | 4.60538  | 59.43 | 5.23      | 3.09E-06  | 2.00E-07  | 0.0371847 | 0.005994  | interaction    | 0.5483    | 569.2     | 23.90%         | 218.1   | 12.60%  | 284.8   | 9.10%  | 258.4   | 42.50%  | 292.1   | 29.10%  | 187.2   | 44.50%  |         |        |         |
| 83 | acnB         | P38683  | 181    | 25        | 18       | 12    | 93.5      | 5.24      | 88.35     | 5.16      | 1.13E-06  | 0.8086822      | 7.07E-08  | 0.402828  | strain         | 0.2221  | 9052.2  | 14.60%  | 7895.5 | 28.90%  | 19801.2 | 18.60%  | 27788.5 | 22.90%  | 27116.5 | 14.10%  | 2719   | 28.70%  |
| 85 | fusA_far_fus | POA6M8  | 51     | 17.7      | 5.24     | 81.65 | 5.2       | 0.0021374 | 0.003698  | 0.1066184 | 0.018326  | interaction    | 1.0251    | 7734.1    | 17.80%         | 67016.6 | 65.20%  | 12889.2 | 38.50% | 18777.7 | 75.00%  | 2709.6  | 98.60%  | 42693.8 | 53.50%  |         |        |         |
| 86 | galA         | P69828  | 53     | 39        | 4        | 15    | 16.9      | 5.15      | 16.95     | 5.31      | 4.72E-08  | 1.01E-07       | 0.2265225 | 0.069832  | treat          | 0.6709  | 4791.8  | 13.30%  | 89.9   | 85.00%  | 3363    | 9.00%   | 544.7   | 71.80%  | 2919.3  | 17.20%  | 202.6  | 56.90%  |
| 87 | osmY         | POA4F9  | OE(34) | 21.1/18.2 | 6.3254   | 21.6  | 5.21      | 3.09E-06  | 2.00E-07  | 0.0371847 | 0.005994  | interaction    | 0.5483    | 660.2     | 4.20%          | 607.7   | 126.10% | 1423.2  | 14.20% | 1400.6  | 29.10%  | 2835.6  | 36.30%  | 429.8   | 64.10%  |         |        |         |
| 88 | kad          | P69441  | 132    | 44        | 10       | 15    | 23.6      | 5.55      | 24.52     | 5.33      | 0.000671  | 0.000463       | 0.0225214 | 0.423545  | treat + strain | 0.4336  | 2467.7  | 41.40%  | 8307.3 | 24.60%  | 1814.5  | 13.80%  | 5136.1  | 32.80%  | 1543.3  | 17.60%  | 3670.1 | 66.10%  |
| 89 | hns          | POAFC8  | 85     | 56        | 8        | 26    | 15.4      | 5.44      | 15.82     | 5.32      | 0.0000000 | 0.0000000      | 0.0000000 | 0.0000000 | qualitative    | 0.0000  | 389.9   | 165.70% | 0.00%  | 0.00%   | 765.2   | 46.50%  | 1109.8  | 97.00%  | 1235.7  | 65.00%  | 1012   | 29.70%  |
| 90 | pikB         | P06999  | 188    | 55        | 14       | 22    | 32.5      | 5.25      | 29.82     | 5.34      | 0.0000000 | 0.0000000      | 0.0000000 | 0.0000000 | qualitative    | 0.0000  | 75.6    | 143.70% | 0.00%  | 0.00%   | 206.9   | 29.40%  | 180.5   | 37.50%  | 320.3   | 96.30%  | 137.5  | 96.80%  |
| 91 | pspA         | POA4FM6 | 105    | 33        | 7        | 11    | 25.5      | 5.39      | 24.9      | 5.3       | 0.0000000 | 0.0000000      | 0.0000000 | 0.0000000 | qualitative    | 0.0000  | 257.3   | 99.10%  | 0.00%  | 0.00%   | 225.5   | 53.40%  | 385.4   | 109.70% | 369     | 54.40%  | 1379.9 | 106.10% |
| 92 | osmY         | POA4F9  | OE(34) | 21.1/18.2 | 6.3254   | 21.6  | 5.21      | 3.09E-06  | 2.00E-07  | 0.0371847 | 0.005994  | interaction    | 0.5483    | 660.2     | 4.20%          | 607.7   | 126.10% | 1423.2  | 14.20% | 1400.6  | 29.10%  | 2835.6  | 36.30%  | 429.8   | 64.10%  |         |        |         |
| 92 | rpoE         | POA6G6  | 59     | 36        | 6        | 8     | 21.7      | 5.38      | 21.74     | 5.26      | 0.0000000 | 0.0000000      | 0.0000000 | 0.0000000 | qualitative    | 0.0000  | 0.00%   | 0.00%   | 0.00%  | 0.00%   | 426.4   | 67.80%  | 1919.2  | 26.10%  | 727.6   | 9.20%   | 2225.7 | 23.70%  |
| 92 | ssB          | POA9E0  | 57     | 34        | 6        | 8     | 19        | 5.44      | 21.74     | 5.26      | 0.0000000 | 0.0000000      | 0.0000000 | 0.0000000 | qualitative    | 0.0000  | 0.00%   | 0.00%   | 0.00%  | 0.00%   | 426.4   | 67.80%  | 1919.2  | 26.10%  | 727.6   | 9.20%   | 2225.7 | 23.70%  |
| 93 | mdh          | P61889  | 96     | 38        | 10       | 33    | 32.3      | 5.61      | 34.5      | 5.3       | 0.004835  | 0.1633048      | 0.0007001 | 0.619563  | strain         | 0.4273  | 7108.2  | 8.90%   | 9100.5 | 10.40%  | 2300.1  | 19.80%  | 3823.7  | 34.70%  | 4838.4  | 95.30%  | 3733.4 | 15.50%  |
| 94 | mdh          | P61889  | 182    | 44        | 11       | 4     | 32.3      | 5.61      | 31.42     | 5.33      | 0.0000559 | 0.0020139      | 0.0001102 | 0.056813  | treat + strain | 0.1981  | 3499.1  | 19.80%  | 1921.7 | 21.70%  | 1669.3  | 14.00%  | 1558.4  | 17.20%  | 1679.3  | 21.60%  | 1334.2 | 24.10%  |
| 95 | yhz2         | P33362  | 81     | 32        | 9        | 26    | 32.6/30.2 | 5.82/5.56 | 28.8      | 5.4       | 0.0000000 | 0.0000000      | 0.0000000 | 0.0000000 | qualitative    | 0.0000  | 0.00%   | 0.00%   | 0.00%  | 0.00%   | 268.7   | 11.60%  | 135.6   | 97.30%  | 106.5   | 28.00%  | 57.1   | 72.80%  |
| 95 | dapD         | POA9D8  | 74     | 32        | 8        | 26    | 29.9      | 5.56      | 28.8      | 5.4       | 0.0000000 | 0.0000000      | 0.0000000 | 0.0000000 | qualitative    | 0.0000  | 0.00%   | 0.00%   | 0.00%  | 0.00%   | 268.7   | 11.60%  | 135.6   | 97.30%  | 106.5   | 28.00%  | 57.1   | 72.80%  |
| 96 | tpaA         | P0A510  | 85     | 33        | 8        | 17    | 27        | 5.64      | 25.98     | 5.44      | 0.0000000 | 0.0000000      | 0.0000000 | 0.0000000 | qualitative    | 0.0000  | 744.8   | 156.80% | 0.00%  | 0.00%   | 1697.1  | 33.40%  | 668.4   | 67.70%  | 415.1   | 147.00% | 967.9  | 35.90%  |
| 97 | galT         | P27248  | 81     | 19        | 6        | 4     | 5.36      | 37.15     | 5.24      | 5.31      | 0.0000000 | 0.0000000      | 0.0000000 | 0.0000000 | qualitative    | 0.0000  | 1844.2  | 29.70%  | 335.8  | 107.60% | 1630.2  | 46.20%  | 825.4   | 46.20%  | 854.4   | 29.00%  | 1245.3 | 28.90%  |
| 98 | eno          | POA6P9  | 180    | 39        | 12       | 4     | 45.5      | 5.32      | 41.66     | 5.28      | 0.0029195 | 0.0156129      | 0.2377147 | 0.000451  | interaction    | 0.4949  | 1640.2  | 34.70%  |        |         |         |         |         |         |         |         |        |         |

| 149 | ylfG   | P39831       | 65      | 32 | 6  | 21 | 27.2      | 5.65      | 27.01 | 5.58 | 6.42E-07  | 1.40E-06  | 5.89E-07  | 0.000238  | interaction    | 0.3732 | 1965.8 | 25.10%  | 178.8  | 81.70%  | 3652.1  | 20.30% | 2150.6 | 42.80%  | 3962.2 | 34.40% | 2273.4 | 16.10% |
|-----|--------|--------------|---------|----|----|----|-----------|-----------|-------|------|-----------|-----------|-----------|-----------|----------------|--------|--------|---------|--------|---------|---------|--------|--------|---------|--------|--------|--------|--------|
| 150 | yhDc   | POA9V1       | 94      | 34 | 7  | 10 | 26.7      | 5.64      | 26.68 | 5.58 | 0.000287  | 0.0001648 | 0.0153862 | 0.063335  | treat + strain | 0.4014 | 2796   | 30.20%  | 3535.3 | 36.00%  | 1492.1  | 71.40% | 3844.8 | 23.70%  | 845.3  | 47.00% | 2830.3 | 23.30% |
| 151 | cyoD   | P22255       | 78      | 43 | 8  | 14 | 27.2      | 5.59      | 25.52 | 5.59 | 0.000287  | 0.0001648 | 0.0153862 | 0.063335  | qualitative    | 0.0000 | 594.8  | 36.60%  | 0.00%  | 641.6   | 11.90%  | 534.8  | 0.00%  | 631.6   | 19.90% | 351.9  | 22.40% |        |
| 152 | cyoO   | P22255       | 62      | 39 | 6  | 34 | 27.2      | 5.59      | 27.73 | 5.62 | 0.000287  | 0.0001648 | 0.0153862 | 0.063335  | qualitative    | 0.0000 | 214.6  | 52.90%  | 0.00%  | 325.2   | 47.80%  | 376    | 55.40% | 268.8   | 60.90% | 379.4  | 22.50% |        |
| 153 | yhO    | P39325       | OE(75)  |    |    |    | 64.4/32.1 | 6.67/5.77 | 30.5  | 5.64 | 3.76E-07  | 1.61E-08  | 0.009316  | 0.2578    | treat + strain | 0.5067 | 8078.3 | 12.10%  | 644.1  | 21.20%  | 3073.9  | 15.10% | 315.6  | 54.10%  | 2275.6 | 52.80% | 497.8  | 55.20% |
| 154 | ylfG   | P39831       | 111     | 44 | 10 | 27 | 27.2      | 5.65      | 27.28 | 5.66 | 0.000287  | 0.0001648 | 0.0153862 | 0.063335  | qualitative    | 0.0000 | 238.6  | 86.40%  | 192.8  | 114.10% | 780.3   | 21.90% | 473.2  | 76.20%  |        |        |        |        |
| 155 | ampM   | PO7506       | 103     | 37 | 9  | 16 | 29.3      | 5.64      | 29.53 | 5.69 | 0.0004335 | 0.0001169 | 0.0234452 | 0.178631  | treat + strain | 0.1986 | 1977.7 | 41.30%  | 2302   | 23.30%  | 1105.4  | 13.50% | 2062.6 | 12.00%  | 1192   | 9.50%  | 1982   | 9.30%  |
| 156 | xylA   | PO7505       | 172     | 53 | 15 | 17 | 30.1      | 5.8       | 27.31 | 5.77 | 0.0004335 | 0.0001169 | 0.0234452 | 0.178631  | qualitative    | 0.0000 | 27.1   | 0.00%   | 0.00%  | 328     | 74.30%  | 368.7  | 28.40% | 234     | 80.30% | 183.4  | 34.10% |        |
| 157 | arlJ   | P30860       | 86      | 41 | 8  | 30 | 26.8/24.9 | 6.83/5.97 | 24.5  | 6.05 | 0.0004335 | 0.0001169 | 0.0234452 | 0.178631  | qualitative    | 0.0000 | 146.1  | 87.10%  | 0.00%  | 331.1   | 82.00%  | 74.6   | 29.00% | 290.7   | 35.10% | 184.7  | 10.90% |        |
| 158 | tesA   | POAD1        | 58      | 32 | 5  | 18 | 23.2/20.0 | 7.93/6.15 | 21.2  | 5.89 | 0.0004335 | 0.0001169 | 0.0234452 | 0.178631  | qualitative    | 0.0000 | 207.2  | 101.30% | 0.00%  | 163.1   | 73.20%  | 133.7  | 42.60% | 196.1   | 85.50% | 210.8  | 73.00% |        |
| 159 | yhHd   | P26466       | 53      | 16 | 4  | 13 | 34.7      | 5.63      | 32.23 | 5.54 | 0.0004335 | 0.0001169 | 0.0234452 | 0.178631  | qualitative    | 0.0000 | 739.2  | 87.20%  | 0.00%  | 652.7   | 24.80%  | 1035.9 | 18.90% | 501.3   | 28.20% | 831    | 7.30%  |        |
| 160 | cyoK   | POAB65       | 237     | 60 | 16 | 11 | 34.5      | 5.83      | 33.37 | 5.61 | 0.0006438 | 0.0010447 | 0.0003924 | 0.050005  | strain         | 0.6581 | 893.3  | 16.50%  | 748.6  | 44.20%  | 287.1   | 16.50% | 130.9  | 136.10% | 427    | 28.70% | 533.4  | 30.30% |
| 161 | prox_p | POAFM7       | 87      |    |    |    | 36.1/33.7 | 5.90/5.65 | 31.5  | 5.77 | 0.0006438 | 0.0010447 | 0.0003924 | 0.050005  | strain         | 0.6581 | 799.2  | 41.10%  | 1346.9 | 12.20%  | 803.7   | 9.00%  | 1545.4 | 15.10%  | 1020.1 | 20.60% | 1819.6 | 21.30% |
| 162 | gpmA   | P26702       | 197     | 55 | 10 | 9  | 28.6      | 5.85      | 25.96 | 5.85 | 0.0162588 | 0.5985811 | 0.0965381 | 0.026503  | interaction    | 0.5634 | 3639.6 | 21.30%  | 1812.2 | 95.20%  | 758.0   | 40.70% | 1945.6 | 59.10%  | 988.4  | 42.40% | 1843.5 | 66.30% |
| 163 | ompR   | POAA16       | 94      | 48 | 9  | 9  | 27.4      | 6.04      | 42.12 | 5.69 | 0.0000352 | 0.0173811 | 0.0000157 | 0.048235  | interaction    | 0.4839 | 818.8  | 29.70%  | 636.8  | 31.20%  | 89.6    | 46.50% | 239.3  | 51.60%  | 286.5  | 53.30% | 807.8  | 23.20% |
| 164 | yhbZ   | POA9K3       | 90      |    |    |    | 39.1      | 5.71      | 37.17 | 5.71 | 0.0006997 | 0.0035442 | 0.0063558 | 0.116455  | treat + strain | 0.3937 | 767.9  | 21.40%  | 783.4  | 7.70%   | 393.2   | 11.70% | 511.9  | 48.20%  | 273.8  | 87.30% | 370.5  | 8.10%  |
| 165 | trpB   | POA879       | 101     | 25 | 10 | 19 | 43.0      | 5.71      | 41.69 | 5.73 | 0.0000967 | 0.1013143 | 0.0000109 | 0.08823   | strain         | 0.5446 | 305.6  | 45.90%  | 116.3  | 89.30%  | 771     | 26.30% | 910.7  | 66.10%  | 1010.3 | 39.70% | 984.4  | 44.70% |
| 166 | ackA   | POA6A3       | 81      | 27 | 8  | 21 | 43.3      | 5.85      | 41.69 | 5.73 | 0.0000967 | 0.1013143 | 0.0000109 | 0.08823   | strain         | 0.5446 | 305.6  | 45.90%  | 116.3  | 89.30%  | 771     | 26.30% | 910.7  | 66.10%  | 1010.3 | 39.70% | 984.4  | 44.70% |
| 167 | ackA   | POAB77       | 125     | 32 | 11 | 15 | 43.1      | 5.64      | 40.48 | 5.75 | 0.0000403 | 0.0005119 | 0.0002062 | 0.4079777 | qualitative    | 0.1874 | 343.8  | 30.50%  | 0.00%  | 467.1   | 15.90%  | 223.4  | 74.40% | 250.4   | 52.60% | 235.9  | 65.10% |        |
| 168 | ompA   | POA910       | 91      |    |    |    | 37.3/35.2 | 5.99/5.60 | 34.64 | 5.76 | 0.0003169 | 0.0004695 | 0.0001134 | 0.878908  | treat + strain | 0.8103 | 3022.9 | 47.80%  | 9842.3 | 50.90%  | 681.4   | 26.20% | 1823.9 | 48.80%  | 368.1  | 84.60% | 849.6  | 51.30% |
| 169 | gapA   | POA9B2       | 118     | 35 | 10 | 12 | 35.4      | 6.58      | 34.06 | 6.03 | 0.0004335 | 0.0001169 | 0.0234452 | 0.178631  | qualitative    | 0.0000 | 1305   | 102.60% | 0.00%  | 1861.9  | 37.00%  | 2553.5 | 18.00% | 312.7   | 35.90% | 2056.5 | 26.40% |        |
| 170 | rsmC   | P39406       | 53      | 19 | 6  | 12 | 37.5      | 6         | 34.06 | 6.03 | 0.0004335 | 0.0001169 | 0.0234452 | 0.178631  | qualitative    | 0.0000 | 1305   | 102.60% | 0.00%  | 1861.9  | 37.00%  | 2553.5 | 18.00% | 312.7   | 35.90% | 2056.5 | 26.40% |        |
| 171 | mshA   | P38720       | OE(67)  |    |    |    | 51.3      | 5.52      | 49.25 | 5.54 | 3.10E-06  | 7.05E-08  | 0.1238167 | 0.003177  | interaction    | 0.5206 | 5256.1 | 28.90%  | 1283   | 48.60%  | 3312.4  | 33.30% | 719    | 36.40%  | 3737.9 | 67.10% | 620.3  | 27.40% |
| 172 | pyrG   | POA7E5       | 185     | 29 | 17 | 16 | 60.4      | 5.63      | 47.82 | 5.66 | 0.0000764 | 2.73E-06  | 0.4193372 | 0.190615  | treat + strain | 0.4321 | 2151.8 | 12.60%  | 2995.4 | 5.80%   | 769.8   | 25.50% | 1345.9 | 21.50%  | 786.9  | 35.00% | 1493   | 22.30% |
| 173 | tdpA   | P76128       | 74      |    |    |    | 57.6/54.9 | 6.29/5.64 | 54.91 | 5.54 | 0.0000764 | 2.73E-06  | 0.4193372 | 0.190615  | treat + strain | 0.4321 | 351.8  | 22.10%  | 115    | 8.90%   | 376.9   | 10.30% | 70.2   | 71.50%  | 306    | 15.00% | 98.3   | 51.40% |
| 174 | ddpA   | P23847       | 78      | 19 | 9  | 15 | 60.3/57.4 | 6.21/5.75 | 57.68 | 5.56 | 0.0004335 | 0.0001169 | 0.0234452 | 0.178631  | qualitative    | 0.0000 | 295.5  | 44.40%  | 134.8  | 121.90% | 164.5   | 40.60% | 146.7  | 32.30%  |        |        |        |        |
| 175 | tdpA   | POA9P0       | OE(70)  |    |    |    | 50.9      | 5.79      | 52.71 | 5.58 | 2.75E-12  | 8.51E-14  | 1.46E-07  | 0.347143  | treat + strain | 0.1823 | 761    | 14.80%  | 3692.1 | 9.00%   | 312.2   | 15.10% | 1463.4 | 19.60%  | 308    | 11.70% | 2489.9 | 25.70% |
| 176 | pyrG   | POA7E5       | 76      |    |    |    | 60.3      | 5.63      | 61.86 | 5.61 | 0.0213852 | 0.1461446 | 0.0079285 | 0.351595  | strain         | 0.4171 | 942.0  | 24.70%  | 0.4171 | 16.10%  | 464.7   | 27.20% | 637    | 52.40%  | 378    | 26.20% | 694.1  | 13.80% |
| 177 | tdpA   | POA9P0       | 194     | 32 | 18 | 20 | 50.6      | 5.79      | 52.78 | 5.63 | 0.0002058 | 0.0488764 | 0.0007996 | 0.257367  | treat + strain | 0.622  | 1132.1 | 25.20%  | 1148.8 | 31.30%  | 194.4   | 78.70% | 421.7  | 17.00%  | 417.1  | 51.60% | 685    | 52.80% |
| 178 | atpA   | POA8B0       | 66      | 11 | 3  | 0  | 55.2      | 5.8       | 53.27 | 5.65 | 0.0067991 | 0.0023854 | 0.0717494 | 0.156934  | treat + strain | 0.622  | 960.7  | 14.80%  | 1319.3 | 28.60%  | 388.9   | 53.20% | 903.5  | 44.00%  | 374    | 78.40% | 1260.5 | 18.40% |
| 179 | ddpA   | P23847       | OE(84)  |    |    |    | 60.3/57.4 | 6.21/5.75 | 55.97 | 5.69 | 9.33E-07  | 6.51E-06  | 1.32E-06  | 0.070059  | treat + strain | 0.5844 | 2069.5 | 27.70%  | 278.1  | 79.50%  | 12818.7 | 57.90% | 3112.1 | 13.00%  | 1485.7 | 19.40% | 549.7  | 17.50% |
| 180 | atpA   | POA8B0       | OE(89)  |    |    |    | 61.0/58.4 | 6.05/5.85 | 57.69 | 5.69 | 0.00067   | 0.0000137 | 0.6974971 | 0.502352  | qualitative    | 0.0000 | 174.6  | 106.70% | 492.3  | 0.00%   | 157.8   | 29.90% | 227.1  | 70.00%  | 300    | 77.90% | 197    | 77.50% |
| 181 | atpA   | POA8B0       | 217     | 43 | 18 | 14 | 55.2      | 5.8       | 61.25 | 5.92 | 0.00067   | 0.0000137 | 0.6974971 | 0.502352  | qualitative    | 0.0000 | 207.8  | 103.4   | 33.20% | 551.6   | 50.50%  | 585.5  | 42.80% | 635.4   | 32.80% | 615.7  | 28.30% |        |
| 182 | oppA   | P23843       | OE(90)  |    |    |    | 61.0/58.4 | 6.05/5.85 | 57.69 | 5.73 | 0.0001678 | 6.00E-06  | 0.1534895 | 0.063264  | treat + strain | 0.6202 | 594    | 29.20%  | 85.1   | 132.60% | 463     | 7.40%  | 130.7  | 59.10%  | 513.1  | 19.50% | 202.2  | 53.10% |
| 183 | oppA   | P23843       | OE(112) |    |    |    | 61.0/58.4 | 6.05/5.85 | 55.64 | 5.62 | 6.16E-07  | 3.66E-08  | 0.0008336 | 0.112925  | treat + strain | 0.2497 | 5189.5 | 22.60%  | 181.6  | 19.30%  | 10908.9 | 31.50% | 3004.5 | 11.90%  | 5679.3 | 34.70% | 2751.7 | 23.10% |
| 184 | hspX   | P33363       | 79      |    |    |    | 53.5/51.4 | 5.85/5.77 | 60.54 | 5.58 | 0.0019249 | 0.6224205 | 0.0004076 | 0.249158  | strain         | 0.2359 | 246.6  | 23.20%  | 186.2  | 23.30%  | 129.9   | 17.30% | 186.2  | 23.30%  | 113.3  | 46.00% | 137.2  | 32.70% |
| 185 | sdhA   | POA4C1       | 176     | 32 | 15 | 10 | 64.4      | 5.65      | 68.54 | 5.73 | 0.0004335 | 0.0001169 | 0.0234452 | 0.178631  | qualitative    | 0.0000 | 87.2   | 54.30%  | 0.00%  | 87.2    | 67.60%  | 124.5  | 7.60%  | 187.8   | 54.00% | 105.9  | 50.00% |        |
| 186 | pilI   | POA7R1       | 152     | 69 | 11 | 20 | 15.8      | 6.17      | 18.49 | 5.88 | 0.0028146 | 0.0026151 | 0.0761703 | 0.006679  | interaction    | 0.6623 | 2586.6 | 10.90%  | 520    | 147.70% | 1963.4  | 26.90% | 1542.7 | 31.10%  | 1464.5 | 21.60% | 1177.8 | 16.70% |
| 187 | hslV   | POA7B8POA8E7 | OE(92)  |    |    |    | 120       | 31        | 4     | 20   | 19.7      | 5.88      | 23.08     | 5.86      | interaction    | 0.6623 | 1167.9 | 16.40%  | 0.00%  | 863.9   | 13.60%  | 390.6  | 11.50% | 923.1   | 17.50% | 427.9  | 43.30% |        |
| 188 | ycgM   | P76004       | 55      | 19 | 6  | 16 | 43.3      | 5.63      | 32.66 | 5.97 | 0.000512  | 0.00      |           |           |                |        |        |         |        |         |         |        |        |         |        |        |        |        |

(m) Coefficient of variation of spot intensities within a replicate group.
